# Supplementary material for: Seasonality of Polyaromatic Hydrocarbons (PAHs) and Their Derivatives in PM2.5 from Ljubljana, Combustion Aerosol Source Apportionment, and Cytotoxicity of Selected Nitrated Polyaromatic Hydrocarbons (NPAHs)
Source: MDPI journal article supplement (doi:10.3390/toxics11060518), 2023-06-08
Supplement: s1 [file s1]

## SUPPORTING INFORMATION FOR

# Seasonality of Polyaromatic Hydrocarbons (PAHs) and Their Derivatives in PM<sub>2.5</sub> from Ljubljana, Combustion Aerosol Source Apportionment, and Cytotoxicity of Selected Nitrated Polyaromatic Hydrocarbons (NPAHs)

Ivana Drventić<sup>1,2</sup>, Mateo Glumac<sup>3</sup>, Ivana Carev<sup>4,5,6</sup>, Ana Kroflič<sup>7,\*</sup>

*1 Department of Analytical Chemistry, National Institute of Chemistry, Hajdrihova 19, 1000 Ljubljana, Slovenia; ivana.drventic@ki.si*

*2 Faculty of Chemistry and Chemical Technology, University of Ljubljana, Večna pot 113, 1000 Ljubljana, Slovenia*

*3 Laboratory for Cancer Research, School of Medicine, University of Split, Šoltanska 2, 21000 Split, Croatia; mateo.glumac@mefst.hr*

*4 NAOS Institute of Life Science, 355 rue Pierre-Simon Laplace, 13290 Aix-en-Provence, France; carev.ivana@gmail.com*

*5 Mediterranean Institute for Life Science, Meštrovićevo šetalište 45, 21000 Split, Croatia*

*6 Faculty of Science, University of Split, Ruđera Boškovića 33, 21000 Split, Croatia*

*7 Department of Catalysis and Chemical Reaction Engineering, National Institute of Chemistry, Hajdrihova 19, 1000 Ljubljana, Slovenia*

*\* Correspondence: ana.kroflic@ki.si; Tel.: +386-1-476-05-15*

Table S1: Tested analyte concentrations in a cell growth medium; sufficient amount of a standard in DMSO was added to the cell culture to obtain these values.

|                                | Control         | Concentrations tested ( $\mu\text{mol l}^{-1}$ ) |
|--------------------------------|-----------------|--------------------------------------------------|
| 1-nitropyrene (1-nP)           | Water with DMSO | 50, 100, 200                                     |
| 9-nitroanthracene (9-nA)       | Water with DMSO | 100, 200, 400                                    |
| 6-nitrochrysene (6-nC)         | Water with DMSO | 200, 400, 800                                    |
| 6-nitrobenzo[a]pyrene (6-nBaP) | Water with DMSO | 200, 400, 800                                    |

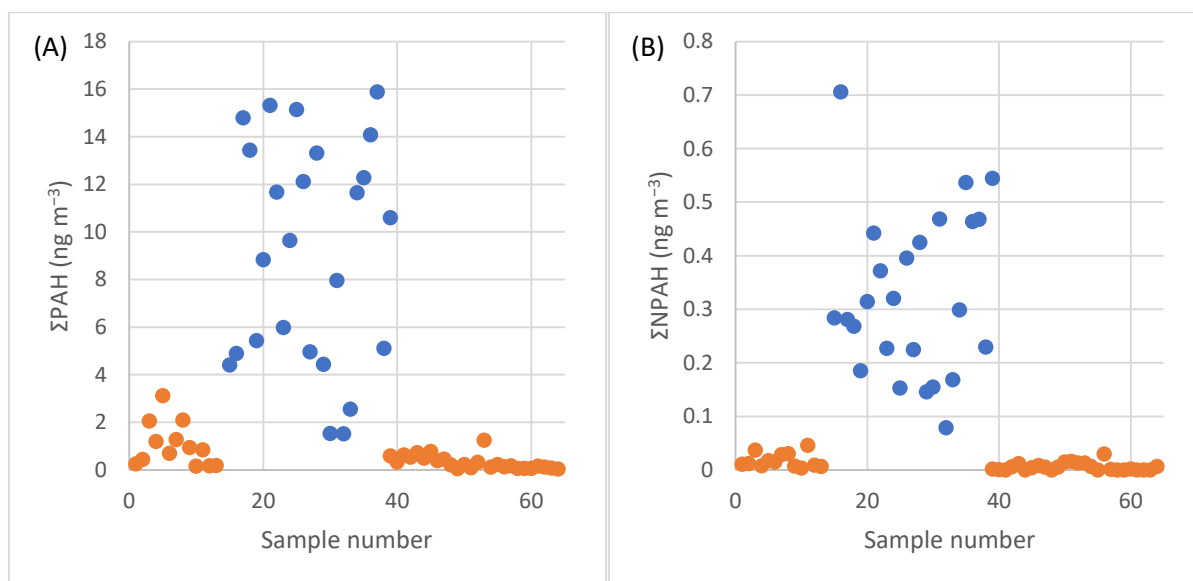

Figure S1. (A) Cumulative particulate PAH and (B) NPAH concentration profiles ( $\Sigma\text{PAH}$  and  $\Sigma\text{NPAH}$ , respectively) in ambient air of Ljubljana, Slovenia for all five seasonal campaigns; sample numbers are adapted from Table S2. Cold-season samples (autumn, winter) are depicted with blue and warm-season samples (spring, summer) with orange symbols.

Table S2: Particulate PAH and NPAH concentrations in ambient air of Ljubljana, Slovenia. The samples were collected in all four seasons: summer 03.08.-17.08.2020 and 21.6.-04.07.2021; autumn 09.11.-22.11.2020; winter 15.02.-28.02.2021; spring 24.05.-06.06.2021.

| No.         | Date  | Acy<br>[ng/m3] | Ant<br>[ng/m3] | Phe<br>[ng/m3] | Flu<br>[ng/m3] | Pyr<br>[ng/m3] | Cry<br>[ng/m3] | BaA<br>[ng/m3] | BbF<br>[ng/m3] | BkF<br>[ng/m3] | BaP<br>[ng/m3] | DBA<br>[ng/m3] | BgP<br>[ng/m3] | Ind<br>[ng/m3] | 9nA<br>[ng/m3] | 1nP<br>[ng/m3] | 6nC<br>[ng/m3] |
|-------------|-------|----------------|----------------|----------------|----------------|----------------|----------------|----------------|----------------|----------------|----------------|----------------|----------------|----------------|----------------|----------------|----------------|
| Summer 2020 |       |                |                |                |                |                |                |                |                |                |                |                |                |                |                |                |                |
| 1           | 03/08 | n.d.           | 0.0102         | 0.0108         | 0.00385        | 0.0284         | 0.0265         | 0.0766         | 0.0827         | 0.0849         | 0.0179         | 0.0231         | 0.0484         | 0.0277         | 0.00655        | n.d.           | 0.0566         |
| 2           | 04/08 | n.d.           | 0.0050         | 0.00202        | 0.000356       | 0.0156         | 0.0142         | 0.0575         | 0.0445         | 0.0515         | 0.00815        | 0.0130         | 0.0233         | 0.0155         | 0.00200        | n.d.           | 0.00870        |
| 3           | 05/08 | n.d.           | 0.00579        | 0.00544        | 0.000696       | 0.0316         | 0.0205         | 0.0493         | 0.0947         | 0.0879         | 0.0231         | 0.0164         | 0.0586         | 0.0427         | 0.00311        | n.d.           | 0.00853        |
| 4           | 06/08 | n.d.           | 0.0159         | 0.0581         | 0.00830        | 0.104          | 0.0768         | 0.150          | 0.249          | 0.646          | 0.143          | 0.0538         | 0.360          | 0.191          | n.d.           | n.d.           | 0.0372         |
| 5           | 07/08 | n.d.           | 0.0102         | 0.0653         | 0.00646        | 0.0958         | 0.0348         | 0.106          | 0.194          | 0.200          | 0.0918         | 0.0249         | 0.251          | 0.112          | 0.00458        | 0.00307        | n.d.           |
| 6           | 08/08 | n.d.           | 0.0192         | 0.0529         | 0.00564        | 0.105          | 0.138          | 0.241          | 0.627          | 0.691          | 0.2644         | 0.167          | 0.377          | 0.433          | 0.00504        | 0.0122         | n.d.           |
| 7           | 09/08 | n.d.           | 0.0117         | 0.0418         | 0.0106         | 0.0665         | 0.0250         | 0.0740         | 0.134          | 0.126          | 0.0290         | 0.0184         | 0.0866         | 0.0690         | 0.00390        | 0.0112         | n.d.           |
| 8           | 11/08 | n.d.           | 0.00900        | 0.0148         | 0.00190        | 0.0405         | 0.0646         | 0.106          | 0.247          | 0.337          | 0.116          | 0.0629         | 0.128          | 0.152          | 0.00507        | 0.00963        | 0.0137         |
| 9           | 12/08 | n.d.           | 0.0120         | 0.0308         | 0.00270        | 0.0725         | 0.121          | 0.212          | 0.454          | 0.413          | 0.183          | 0.117          | 0.240          | 0.236          | 0.00332        | 0.0272         | n.d.           |
| 10          | 13/08 | n.d.           | 0.00821        | 0.0232         | 0.00290        | 0.0521         | 0.0556         | 0.104          | 0.186          | 0.199          | 0.0634         | 0.0411         | 0.115          | 0.0839         | 0.00496        | 0.00222        | n.d.           |
| 11          | 14/08 | n.d.           | 0.00526        | 0.00634        | 0.00169        | 0.0204         | 0.00889        | 0.0345         | 0.0325         | 0.0279         | n.d.           | 0.00579        | 0.0161         | 0.00436        | 0.00324        | n.d.           | 0.000519       |
| 12          | 15/08 | n.d.           | 0.00865        | 0.0229         | 0.00295        | 0.0342         | 0.0413         | 0.0771         | 0.185          | 0.159          | 0.0620         | 0.0453         | 0.0999         | 0.106          | 0.00273        | 0.0342         | 0.00879        |
| 13          | 16/08 | n.d.           | 0.00575        | 0.00273        | n.d.           | 0.0150         | 0.00816        | 0.0231         | 0.0372         | 0.0343         | 0.00187        | 0.00859        | 0.0211         | 0.0159         | 0.00356        | n.d.           | 0.00507        |
| 14          | 17/08 | n.d.           | 0.00393        | 0.00468        | 0.000222       | 0.0239         | 0.0114         | 0.0329         | 0.0427         | 0.0369         | 0.003017       | 0.00412        | 0.0161         | 0.00655        | 0.00172        | n.d.           | 0.00487        |
| Autumn 2020 |       |                |                |                |                |                |                |                |                |                |                |                |                |                |                |                |                |
| 15          | 12/11 | n.d.           | 0.00347        | n.d.           | n.d.           | 0.238          | 0.500          | 0.316          | 0.916          | 0.824          | 0.532          | 0.169          | 0.396          | 0.520          | 0.0311         | 0.0367         | 0.216          |
| 16          | 13/11 | 0.0598         | 0.00523        | 0.193          | 0.00172        | 1.08           | 2.03           | n.d.           | 0.0617         | n.d.           | n.d.           | 0.234          | 0.535          | 0.6911         | 0.0839         | 0.0334         | 0.588          |
| 17          | 14/11 | 0.0660         | 0.00859        | 0.112          | n.d.           | 0.860          | 2.19           | 1.54           | 1.288          | 2.76           | 2.54           | 0.800          | 1.13           | 1.49           | 0.204          | 0.0252         | 0.0513         |
| 18          | 15/11 | 0.0421         | 0.00412        | 0.0833         | n.d.           | 0.775          | 2.27           | 1.568          | 1.81           | 2.68           | n.d.           | 0.819          | 1.60           | 1.78           | 0.132          | 0.0246         | 0.112          |
| 19          | 16/11 | 0.00440        | 0.00388        | n.d.           | n.d.           | 0.245          | 0.497          | 0.334          | 1.06           | 0.992          | n.d.           | 0.396          | 0.851          | 1.04           | 0.0478         | 0.0742         | 0.0632         |
| 20          | 17/11 | 0.0250         | 0.0122         | 0.0362         | n.d.           | 0.519          | 1.34           | 1.06           | 1.74           | 1.56           | 1.34           | 0.219          | 0.489          | 0.508          | 0.0877         | 0.0763         | 0.150          |
| 21          | 18/11 | 0.0305         | 0.0100         | 0.101          | n.d.           | 1.36           | 2.67           | 2.28           | 2.49           | 2.40           | 2.04           | 0.299          | 0.698          | 0.950          | 0.0809         | 0.184          | 0.178          |
| 22          | 19/11 | 0.0322         | 0.0307         | 0.165          | 2.96E-05       | 1.05           | 1.90           | 1.41           | 1.80           | 2.19           | 1.60           | 0.229          | 0.466          | 0.792          | 0.0593         | 0.0980         | 0.214          |
| 23          | 20/11 | 0.0138         | 0.00785        | n.d.           | n.d.           | 0.408          | 0.667          | 0.456          | 1.06           | 1.08           | 0.822          | 0.228          | 0.576          | 0.662          | 0.0399         | 0.0589         | 0.128          |
| 24          | 21/11 | 0.0188         | 0.00407        | n.d.           | n.d.           | 0.495          | 1.52           | 1.18           | 1.61           | 1.52           | 1.36           | 0.373          | 0.711          | 0.847          | 0.0837         | 0.169          | 0.0670         |
| 25          | 22/11 | 0.1089         | 0.0171         | 0.262          | n.d.           | 2.79           | 5.71           | 2.98           | 0.524          | 1.22           | 0.840          | n.d.           | 0.687          | n.d.           | n.d.           | 0.0315         | 0.121          |

|    |       | Winter 2021 |         |         |          |         |         |         |        |         |         |         |        |          |         |         |          |
|----|-------|-------------|---------|---------|----------|---------|---------|---------|--------|---------|---------|---------|--------|----------|---------|---------|----------|
| 26 | 15/02 | 0.0292      | 0.0325  | 0.168   | n.d.     | 0.895   | 1.02    | 0.660   | 1.76   | 1.77    | 1.86    | 0.540   | 1.37   | 2.00     | 0.0809  | 0.159   | 0.156    |
| 27 | 16/02 | 0.0111      | 0.0162  | 0.0524  | n.d.     | 0.560   | 0.514   | 0.266   | 0.696  | 0.591   | 0.416   | 0.238   | 0.733  | 0.867    | 0.0903  | 0.0658  | 0.0688   |
| 28 | 17/02 | 0.0432      | 0.0116  | 0.0944  | n.d.     | 1.31    | 2.77    | 2.24    | 2.02   | 1.94    | 1.23    | 0.298   | 0.602  | 0.765    | 0.238   | 0.0880  | 0.0994   |
| 29 | 18/02 | 0.0161      | 0.00819 | 0.0423  | n.d.     | 0.496   | 0.572   | 0.324   | 0.934  | 0.723   | 0.295   | 0.157   | 0.383  | 0.486    | 0.0556  | 0.0604  | 0.0297   |
| 30 | 19/02 | 0.000756    | 0.00462 | n.d.    | n.d.     | 0.204   | 0.385   | 0.147   | 0.436  | 0.201   | 0.0212  | 0.0306  | 0.0375 | 0.0642   | 0.0806  | 0.0744  | n.d.     |
| 31 | 20/02 | 0.0333      | 0.00153 | 0.0215  | n.d.     | 0.633   | 1.83    | 1.08    | 1.82   | 2.05    | 0.461   | 0.0281  | 0.0149 | n.d.     | 0.334   | 0.0432  | 0.0909   |
| 32 | 21/02 | n.d.        | 0.00203 | n.d.    | n.d.     | 0.190   | 0.278   | 0.110   | 0.351  | 0.534   | 0.0158  | n.d.    | n.d.   | 0.0369   | 0.0290  | 0.0165  | 0.0331   |
| 33 | 22/02 | n.d.        | 0.00434 | n.d.    | 0.00181  | 0.247   | 0.599   | 0.263   | 0.510  | 0.645   | 0.258   | n.d.    | 0.0106 | 0.00927  | 0.0644  | 0.104   | n.d.     |
| 34 | 23/02 | 0.0636      | 0.00240 | 0.158   | 0.00133  | 1.27    | 2.52    | 1.81    | 1.49   | 1.93    | 1.70    | 0.0811  | 0.217  | 0.386    | 0.185   | 0.0308  | 0.0831   |
| 35 | 24/02 | 0.0618      | 0.00458 | 0.207   | n.d.     | 1.45    | 2.24    | 1.63    | 1.73   | 1.65    | 1.96    | 0.314   | 0.391  | 0.646    | 0.262   | 0.0716  | 0.203    |
| 36 | 25/02 | 0.0542      | 0.00381 | 0.170   | n.d.     | 1.92    | 2.58    | 1.97    | 1.96   | 1.99    | 2.09    | 0.288   | 0.373  | 0.687    | 0.288   | 0.0710  | 0.105    |
| 37 | 26/02 | 0.0534      | 0.00410 | 0.150   | n.d.     | 1.48    | 2.36    | 1.94    | 2.32   | 2.36    | 2.02    | 0.508   | 1.27   | 1.42     | 0.238   | 0.138   | 0.0917   |
| 38 | 27/02 | 0.0127      | 0.00730 | n.d.    | n.d.     | 0.360   | 0.562   | 0.337   | 0.728  | 0.898   | 0.747   | 0.240   | 0.615  | 0.605    | 0.0344  | 0.0370  | 0.158    |
| 39 | 28/02 | 0.0618      | 0.0265  | 0.121   | 0.00329  | 1.05    | 1.80    | 1.23    | 1.46   | 1.75    | 1.25    | 0.3358  | 0.742  | 0.770    | 0.286   | 0.151   | 0.108    |
|    |       | Spring 2021 |         |         |          |         |         |         |        |         |         |         |        |          |         |         |          |
| 40 | 26/05 | n.d.        | 0.00348 | 0.0143  | 0.00142  | 0.0376  | 0.0235  | 0.0634  | 0.124  | 0.142   | 0.0310  | 0.0168  | 0.0768 | 0.0572   | n.d.    | n.d.    | 0.00190  |
| 41 | 27/05 | n.d.        | 0.00333 | 0.0157  | 0.00144  | 0.0314  | 0.0121  | 0.0385  | 0.0670 | 0.0633  | 0.0123  | 0.00867 | 0.0447 | 0.0304   | n.d.    | n.d.    | 0.000578 |
| 42 | 28/05 | n.d.        | 0.00372 | 0.0120  | 0.000578 | 0.0511  | 0.0282  | 0.0573  | 0.127  | 0.155   | 0.0370  | 0.0154  | 0.0731 | 0.0681   | n.d.    | n.d.    | n.d.     |
| 43 | 29/05 | n.d.        | 0.00393 | 0.0161  | 0.00156  | 0.0411  | 0.0192  | 0.0537  | 0.120  | 0.132   | 0.0284  | 0.0134  | 0.0604 | 0.0412   | n.d.    | n.d.    | 0.00606  |
| 44 | 30/05 | n.d.        | 0.00510 | 0.0249  | 0.00287  | 0.0552  | 0.0308  | 0.0766  | 0.150  | 0.172   | 0.0490  | 0.0192  | 0.0723 | 0.0642   | n.d.    | n.d.    | 0.0121   |
| 45 | 31/05 | n.d.        | 0.00239 | 0.0203  | 0.000430 | 0.0467  | 0.0231  | 0.0656  | 0.109  | 0.113   | 0.0267  | 0.0112  | 0.0447 | 0.0390   | n.d.    | n.d.    | n.d.     |
| 46 | 01/06 | n.d.        | 0.00237 | 0.0312  | 0.00390  | 0.0498  | 0.0312  | 0.0868  | 0.159  | 0.175   | 0.0430  | 0.0241  | 0.095  | 0.0739   | n.d.    | n.d.    | 0.00391  |
| 47 | 02/06 | n.d.        | 0.00317 | 0.0217  | 0.00290  | 0.0313  | 0.0173  | 0.0567  | 0.0901 | 0.0789  | 0.0169  | 0.00862 | 0.0365 | 0.0278   | n.d.    | n.d.    | 0.00836  |
| 48 | 03/06 | n.d.        | 0.00364 | 0.0105  | 0.00185  | 0.0294  | 0.0166  | 0.0486  | 0.111  | 0.0989  | 0.0196  | 0.0109  | 0.0667 | 0.0365   | 0.00483 | n.d.    | 0.000237 |
| 49 | 04/06 | n.d.        | 0.00270 | n.d.    | n.d.     | 0.0128  | 0.0121  | 0.0368  | 0.0600 | 0.0591  | 0.00390 | 0.00514 | 0.0143 | 0.0134   | n.d.    | n.d.    | n.d.     |
| 50 | 05/06 | n.d.        | 0.00295 | n.d.    | n.d.     | 0.00573 | 0.00136 | 0.00837 | 0.0219 | 0.00981 | n.d.    | n.d.    | n.d.   | n.d.     | 0.00396 | n.d.    | 0.00114  |
| 51 | 06/06 | n.d.        | 0.00647 | 0.0145  | 0.000933 | 0.0205  | 0.00782 | 0.0237  | 0.0423 | 0.0514  | 0.00653 | 0.00333 | 0.030  | 0.0198   | n.d.    | n.d.    | 0.0150   |
|    |       | Summer 2021 |         |         |          |         |         |         |        |         |         |         |        |          |         |         |          |
| 52 | 21/06 | n.d.        | 0.00304 | 0.00871 | 0.00166  | 0.0137  | 0.00239 | 0.0148  | 0.0205 | 0.0106  | n.d.    | 0.00409 | 0.0140 | 0.000163 | n.d.    | 0.0149  | 0.00145  |
| 53 | 22/06 | n.d.        | 0.00489 | 0.0141  | 0.00364  | 0.0229  | 0.00778 | 0.0273  | 0.0501 | 0.0439  | 0.0104  | 0.00530 | 0.104  | 0.0215   | n.d.    | 0.00449 | 0.00858  |

|    |       |      |          |          |          |         |         |         |         |         |          |          |         |          |      |         |         |
|----|-------|------|----------|----------|----------|---------|---------|---------|---------|---------|----------|----------|---------|----------|------|---------|---------|
| 54 | 23/06 | n.d. | 0.00756  | 0.0251   | 0.00259  | 0.0484  | 0.0552  | 0.108   | 0.285   | 0.276   | 0.0859   | 0.0564   | 0.157   | 0.136    | n.d. | 0.00862 | 0.00427 |
| 55 | 24/06 | n.d. | 0.00280  | 0.00959  | 0.000311 | 0.0163  | 0.00425 | 0.0215  | 0.0288  | 0.0192  | n.d.     | 0.00182  | 0.0121  | 0.00418  | n.d. | 0.00493 | 0.00139 |
| 56 | 25/06 | n.d. | 0.00375  | 0.01159  | 0.000622 | 0.0178  | 0.00720 | 0.0243  | 0.0496  | 0.0471  | 0.00704  | 0.00625  | 0.0317  | 0.0226   | n.d. | n.d.    | n.d.    |
| 57 | 26/06 | n.d. | 0.00373  | 0.00560  | 0.00236  | 0.00956 | 0.00344 | 0.0116  | 0.0341  | 0.0274  | n.d.     | 0.00504  | 0.0201  | 0.0152   | n.d. | n.d.    | 0.0298  |
| 58 | 27/06 | n.d. | 0.00402  | 0.00270  | 0.00206  | 0.0118  | 0.00356 | 0.0120  | 0.0400  | 0.0357  | 0.000385 | 0.00956  | 0.0304  | 0.0263   | n.d. | 0.00101 | n.d.    |
| 59 | 28/06 | n.d. | 0.00262  | 4.44E-05 | n.d.     | 0.0110  | 0.00150 | 0.00994 | 0.0142  | 0.00980 | n.d.     | 0.000178 | 0.0204  | n.d.     | n.d. | n.d.    | n.d.    |
| 60 | 29/06 | n.d. | 0.00324  | 0.00258  | n.d.     | 0.0127  | 0.00379 | 0.0132  | 0.0180  | 0.0132  | n.d.     | n.d.     | n.d.    | n.d.     | n.d. | n.d.    | n.d.    |
| 61 | 30/06 | n.d. | 0.00350  | 0.00578  | 0.000859 | 0.0112  | 0.00194 | 0.0122  | 0.0176  | 0.0119  | n.d.     | n.d.     | 0.00495 | n.d.     | n.d. | n.d.    | 0.00154 |
| 62 | 01/07 | n.d. | 0.00311  | 0.006963 | 0.000370 | 0.0198  | 0.00813 | 0.0188  | 0.0428  | 0.0461  | 0.00692  | n.d.     | n.d.    | 4.44E-05 | n.d. | n.d.    | n.d.    |
| 63 | 02/07 | n.d. | 0.00324  | 0.00421  | n.d.     | 0.0150  | 0.0109  | 0.0211  | 0.0310  | 0.0288  | 0.00207  | n.d.     | n.d.    | n.d.     | n.d. | n.d.    | n.d.    |
| 64 | 03/07 | n.d. | 0.003350 | 0.00489  | 0.000104 | 0.0113  | 0.00268 | 0.0117  | 0.0239  | 0.0147  | n.d.     | n.d.     | n.d.    | n.d.     | n.d. | n.d.    | n.d.    |
| 65 | 04/07 | n.d. | 0.00563  | 0.00655  | 0.000578 | 0.0116  | 0.00212 | 0.00701 | 0.00717 | 0.00239 | n.d.     | n.d.     | n.d.    | n.d.     | n.d. | n.d.    | 0.00630 |

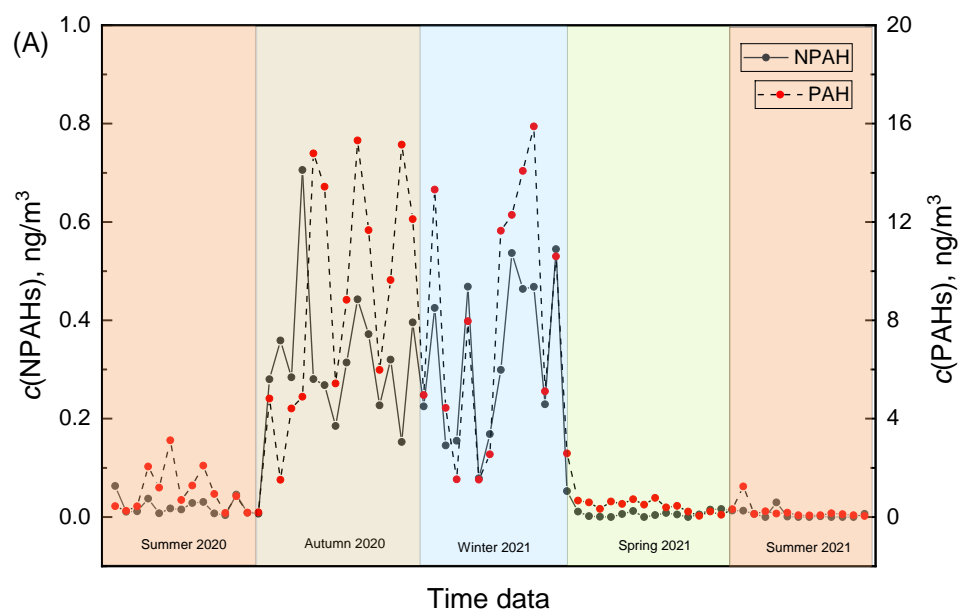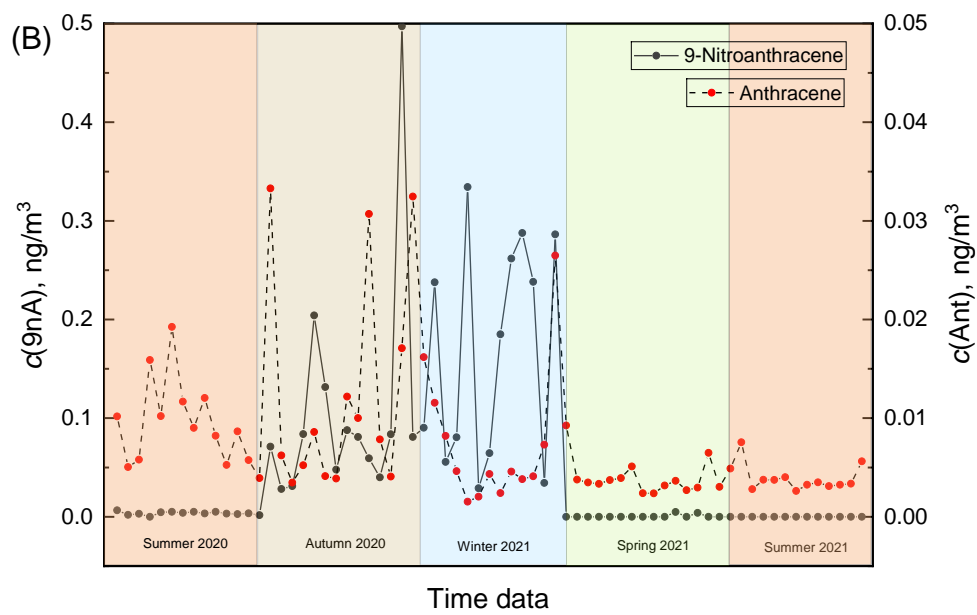

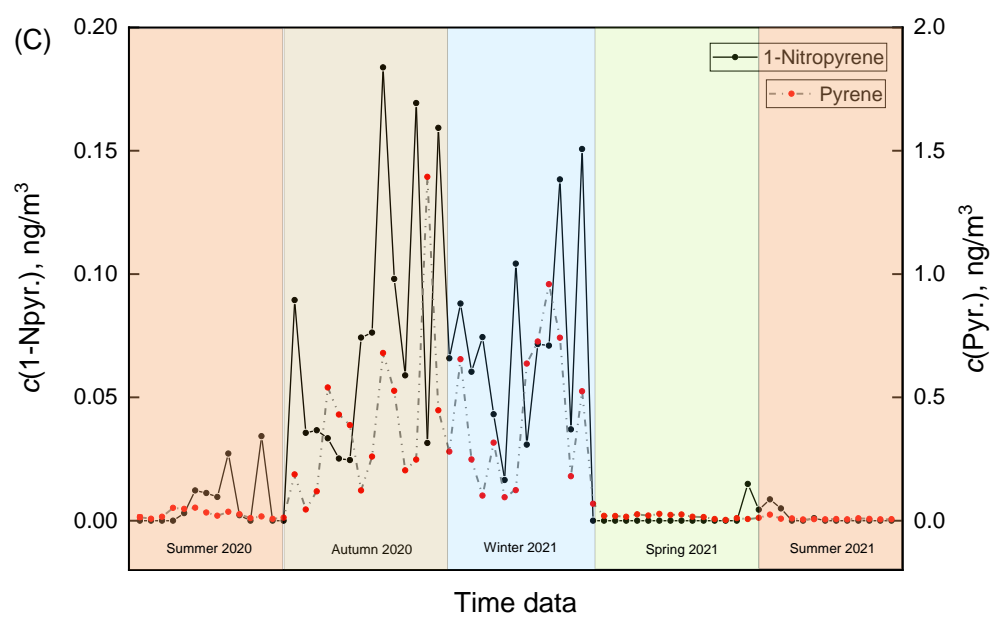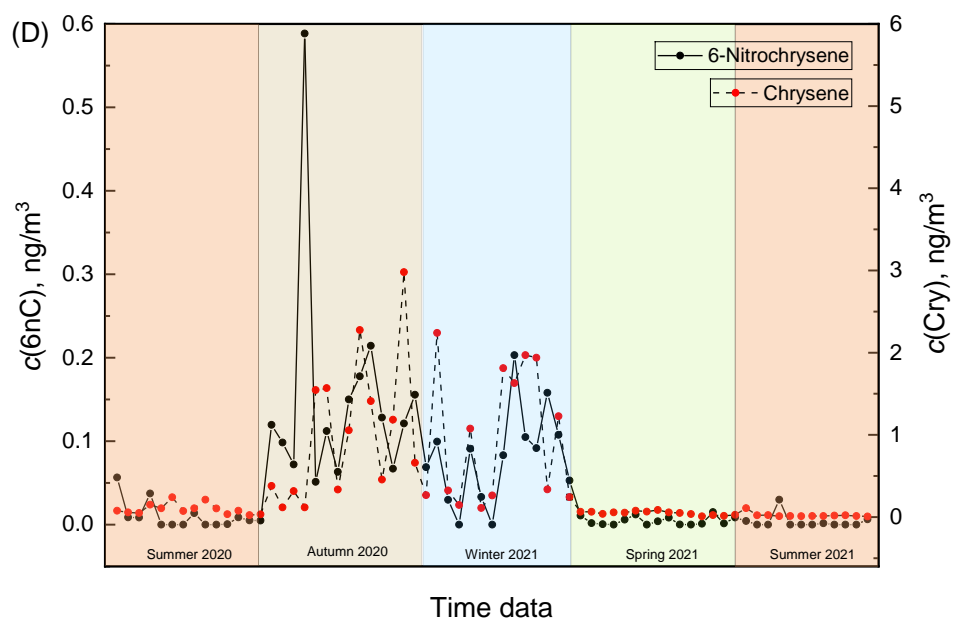

Figure S2. Time series of particulate PAH and NPAH concentrations for selected PAH/NPAH pairs: (A)  $\Sigma\text{PAH}$  and  $\Sigma\text{NPAH}$ , (B) anthracene (Ant) and 9-nitroanthracene (9nA), (C) pyrene (Pyr) and 1-nitropyrene (1nP), and (D) chrysene (Cry) and 6-nitrochrysene (6nC).

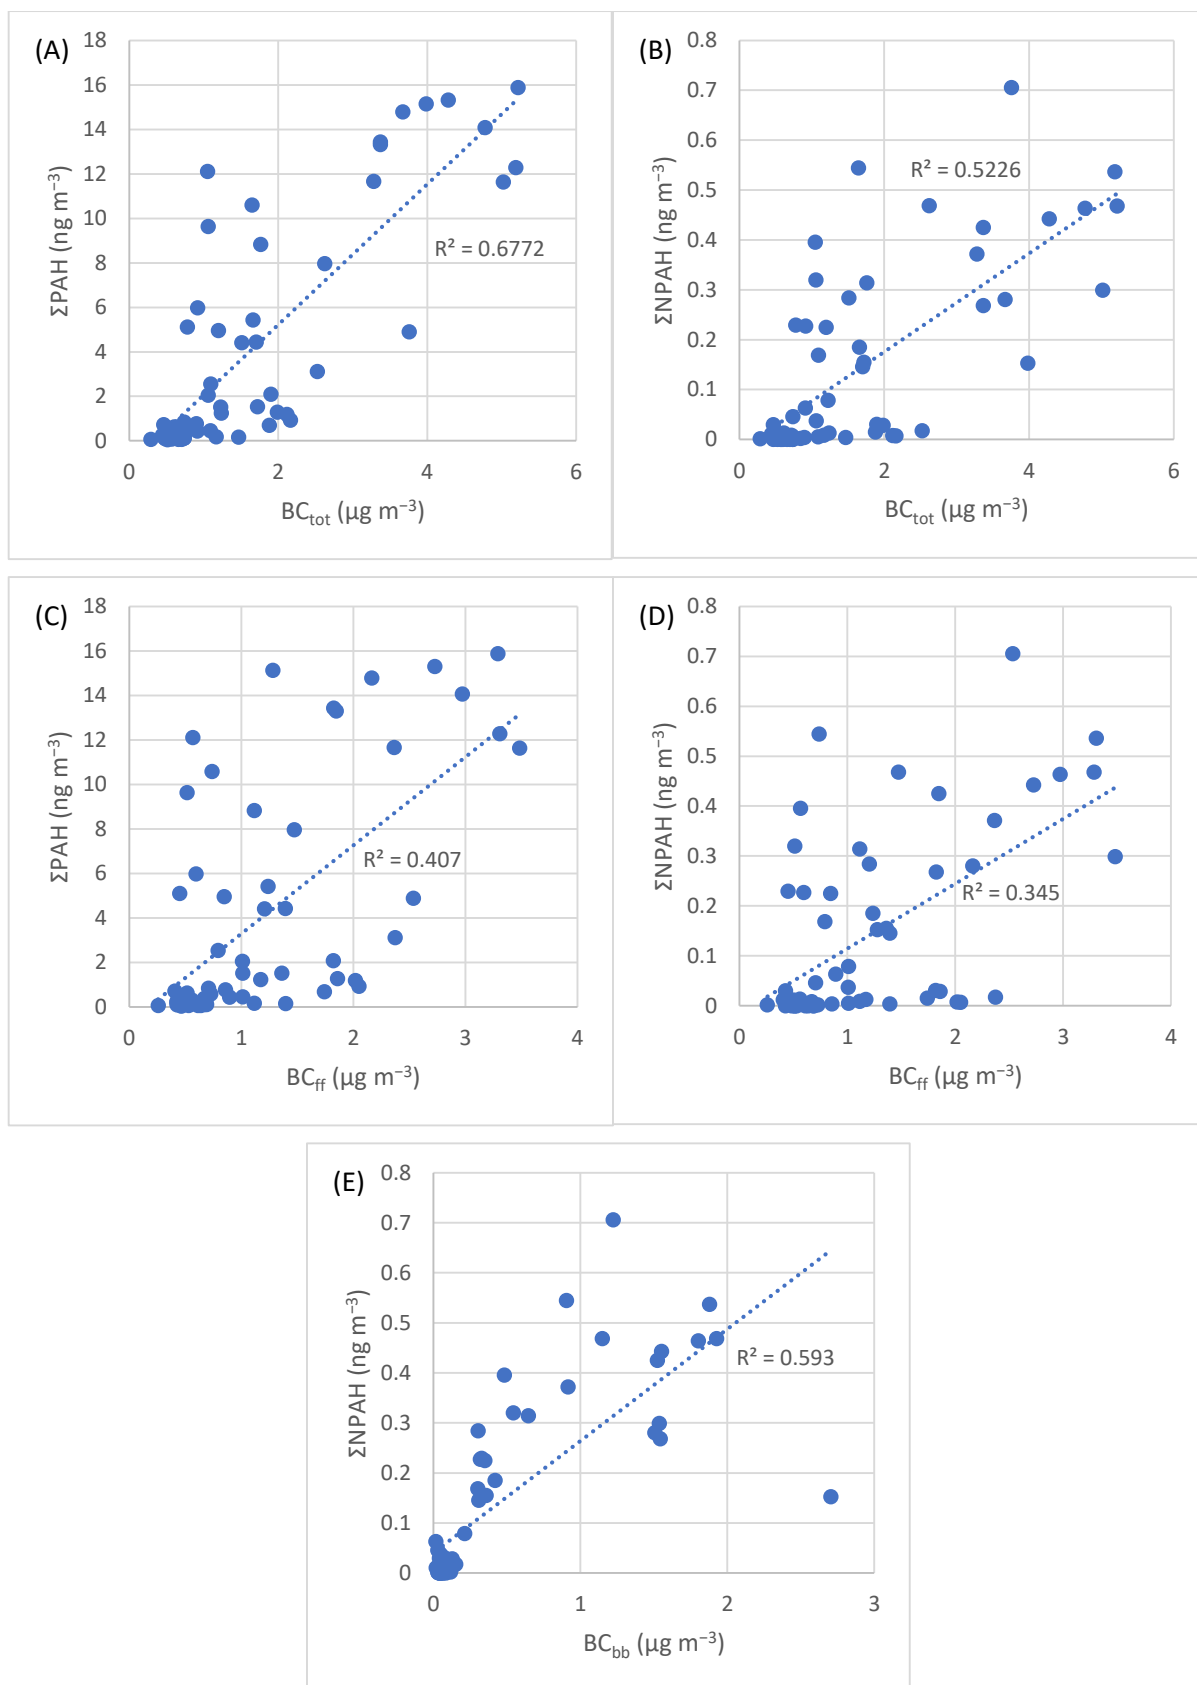

Figure S3. Correlations between cumulative particulate PAHs and NPAHs ( $\Sigma$ PAH and  $\Sigma$ NPAH), and (A,B) total black carbon ( $\text{BC}_{\text{tot}}$ ), (C,D) black carbon from traffic ( $\text{BC}_{\text{ff}}$ ), and (E) black carbon from biomass burning ( $\text{BC}_{\text{bb}}$ ).



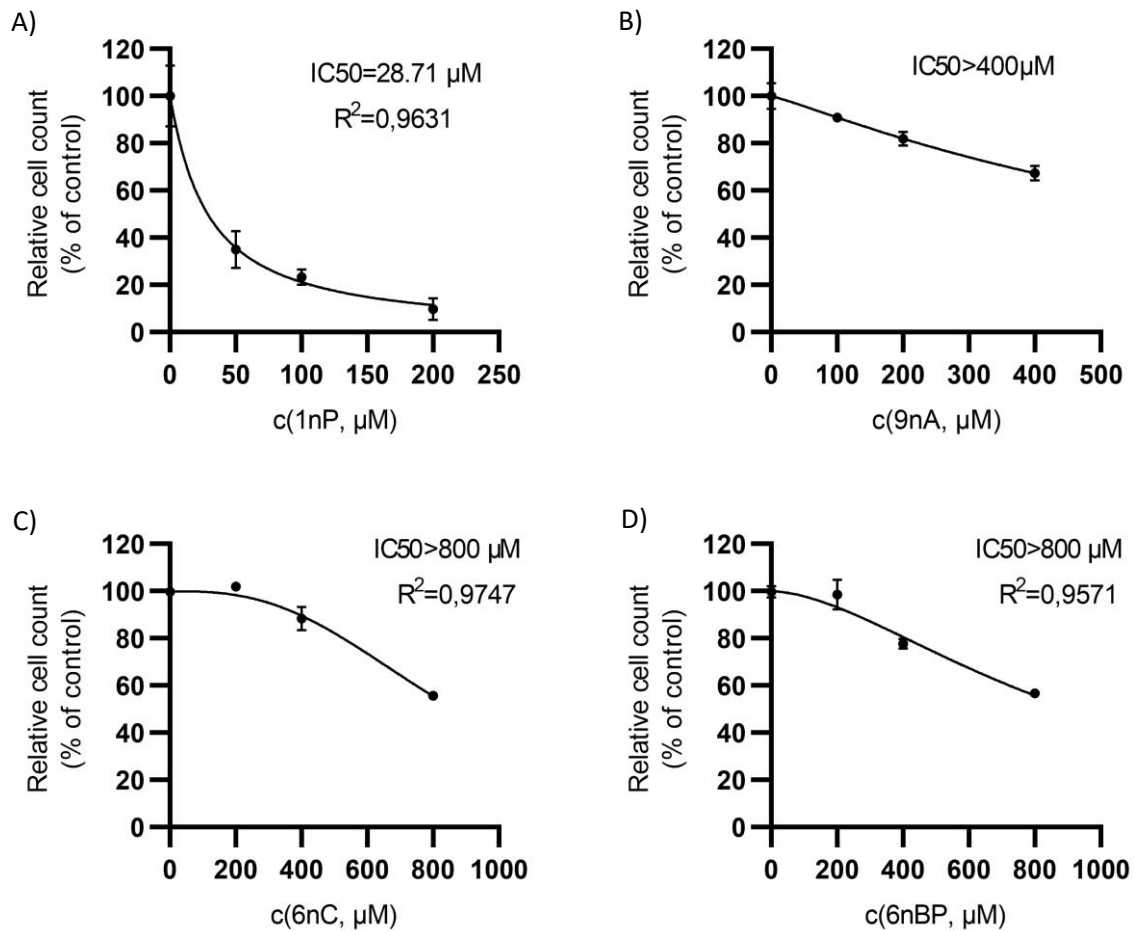

Figure S4.  $IC_{50}$  plots for 24-hours treatment of HEK293T cells with (A) 1-nitropyrene (1-nP), (B) 9-nitroanthracene (9-nA), (C) 6-nitrochrysene (6-nC), and (D) 6-nitrobenzo[a]pyrene (6-nBaP); the plots are constructed based on cell counting. Every experiment was performed in triplicate.

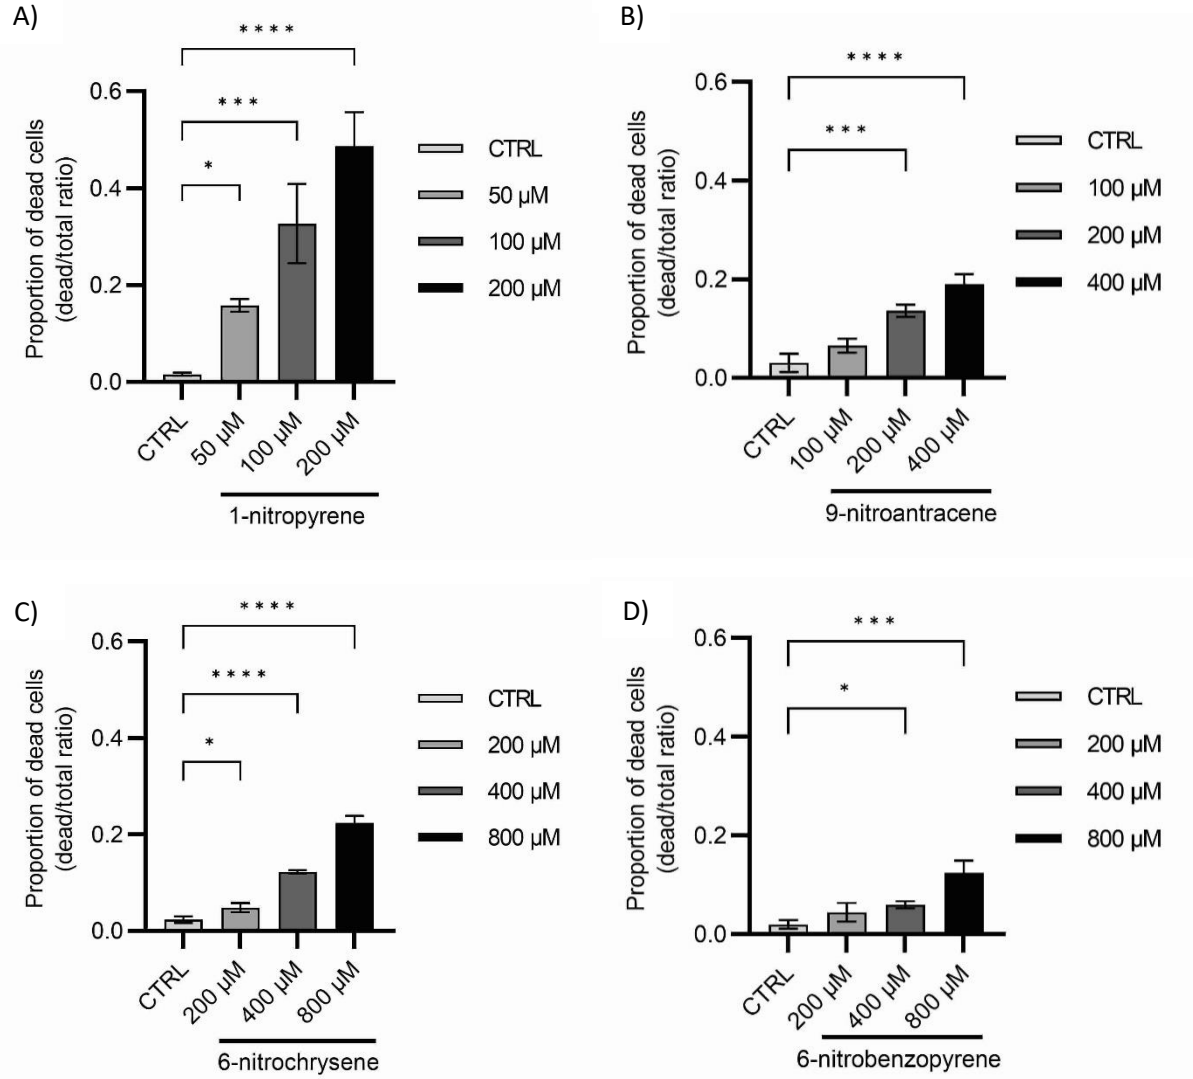

Figure S5. Dead cell counts after 24-hours treatment of HEK293T cells with (A) 1-nitropyrene (1-nP), (B) 9-nitroanthracene (9-nA), (C) 6-nitrochrysene (6-nC), and (D) 6-nitrobenzo[a]pyrene (6-nBaP); for every treatment, control experiment (CTRL) is also given for comparison. Every experiment was performed in triplicate and statistically evaluated by Dunnett's multiple comparison test. Data are shown as mean  $\pm$  SD; different significance levels are assigned with asterisks:  $0.01 \leq p < 0.05$  (\*),  $0.001 \leq p < 0.01$  (\*\*),  $0.0001 \leq p < 0.001$  (\*\*\*),  $p < 0.0001$  (\*\*\*\*).
